# Supplementary material for: Design and construction of a ferrocene based inclined polycatenated Co-MOF for supercapacitor and dye adsorption applications
Source: Royal Society of Chemistry journal article supplement (doi:10.1039/c7ta03773b), 2017-01-01
Supplement: c7ta03773b1.pdf [file c7ta03773b1.pdf]

### **Supplementary information**

## **Design and construction of ferrocene based inclined polycatenated Co-MOF for supercapacitor and dye adsorption applications**

**Richa Rajak,<sup>a</sup> Mohit Saraf,<sup>b</sup> Akbar Mohammad<sup>a</sup> and Shaikh M. Mobin<sup>\*a,b,c</sup>**

<sup>a</sup>Discipline of Chemistry, <sup>b</sup>Discipline of Metallurgy Engineering and Materials Science (MEMS) and <sup>c</sup>Centre for Biosciences and Biomedical Engineering, Indian Institute of Technology Indore, Simrol, Khandwa Road, Indore 453552, India

\*E-mail: [xray@iiti.ac.in](mailto:xray@iiti.ac.in)

Tel: +91 731 2438 762

## Contents:

**Fig. S1** XRD spectra of **1**: simulated (black), (as-synthesized (red).

**Fig. S2** XRD spectra of **2**: simulated (black), (as-synthesized (red).

**Fig. S3** TGA graph of **1**.

**Fig. S4** TGA graph of **2**.

**Fig. S5** FT-IR spectrum of **1**.

**Fig. S6** FT-IR spectrum of **2**.

**Fig. S7** SEM images of **1**.

**Fig. S8** SEM images of **2**.

**Fig. S9** Asymmetric unit of **1**.

Color code: O (red), Fe (olive), N (blue), C (dark gray), Co (magenta) and H (light gray).

**Fig. S10** Octahedral co-ordination environment around Co(II) center in **1**.

Color code: Co (magenta), N (blue), O (red).

**Fig. S11** 1D chain along *c* axis in **1**.

Color code: O (red), Fe (olive), N (blue), C (dark gray) and Co (magenta).

**Fig. S12** Space fill model of the 2D Framework showing the arrangements of FcDCA and bpy ligands along *c*-axis in **1**.

**Fig. S13** (a) Inter/Intra-molecular H- bonding Interaction between the two 2D frameworks, and (b) Packing diagram of **1** showing a 3D framework formed *via* inter/intra-molecular hydrogen-bonding and  $\pi$ - $\pi$  interaction (blue:  $\pi \dots \pi$ ; green: H-bonding).

**Fig. S14**. Pentagonal bipyramidal co-ordination environment around Co(II) center in **2**. Color code: Co (magenta), N (blue), O (red).

**Table S1**. Bond lengths [Å] and angles [°] for **1**.

**Table S2**. H-bonding Interactions in **1**.

**Fig. S15** (a) CV profiles of **2-GCE** at varied scan rates (10-500 mV s<sup>-1</sup>), (b) GCD curves for **2-GCE** at varied current densities (1.2-50 A g<sup>-1</sup>), and (c) GCD curves for **2-GCE** at 1.2 A g<sup>-1</sup>, in 1 M KOH solution.

**Fig. S16** (a) Comparison of CV profiles of **1-GCE** and **2-GCE** at a scan rate of 100 mV s<sup>-1</sup>, (b) comparison of GCD profiles of **1-GCE** and **2-GCE** at 1.2 A g<sup>-1</sup>.

**Fig. S17** Comparison of CV profiles of **1-GCE** before and after cycling.

**Fig. S18** N<sub>2</sub> isotherm and BJH plot of (a) **1** and (b) **2**, respectively.

**Fig. S19** AC conductivity test of **1** and **2**.

**Fig. S20** Adsorption of CSB and CR on **1**.

**Fig. S21** Color change of the reaction system containing (A) CSB, (B) CR in water on **1**.

**Fig. S22** Color change of **1**, (A) before adsorption, (B) after adsorption of CSB (C) after adsorption of CR.

**Fig. S23** UV-*vis* spectra of aqueous solution of CSB adsorption by **2**.

**Fig. S24** UV-*vis* spectra of aqueous solution of CR adsorption by **2**.

**Fig. S25** FTIR analysis of CSB adsorbed on **1** (**CSB@1**).

**Fig. S26** FTIR analysis of CR adsorbed on **1** (**CR@1**).

**Fig. S27** Recyclability study of **1** towards (a) CSB and (b) CR.

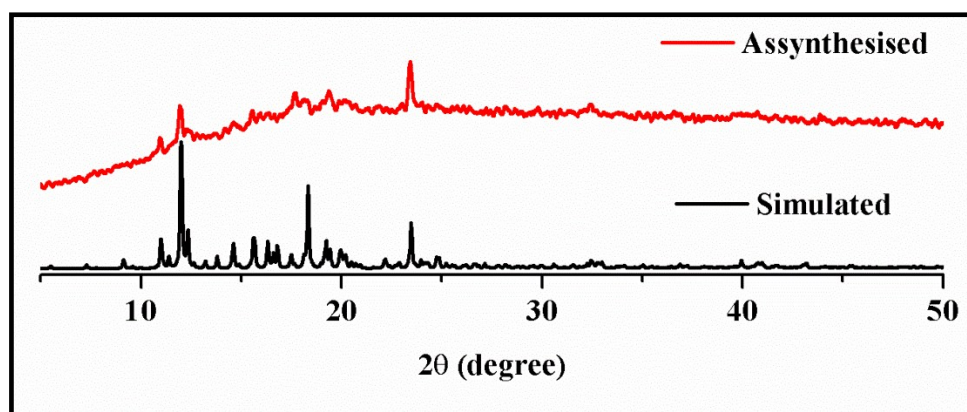

**Fig. S1** XRD spectra of **1**: simulated (black), (as-synthesized (red)).

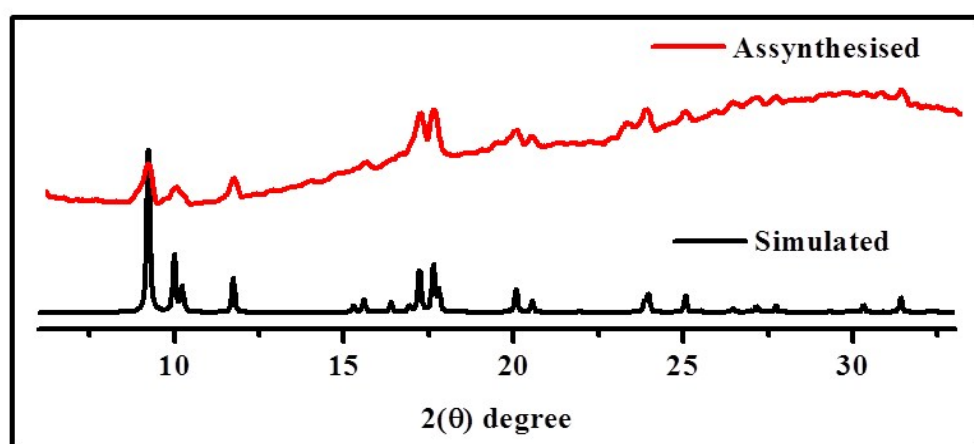

**Fig. S2** XRD spectra of **2**: simulated (black), (as-synthesized (red)).

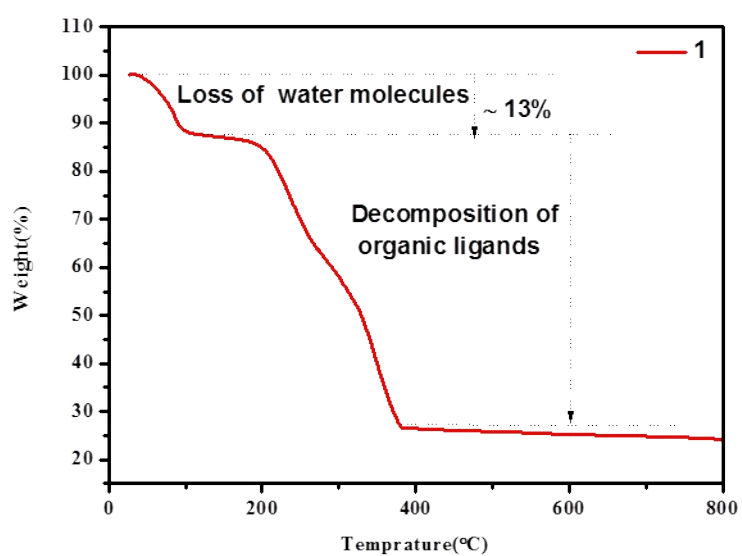

**Fig. S3** TGA graph of 1.

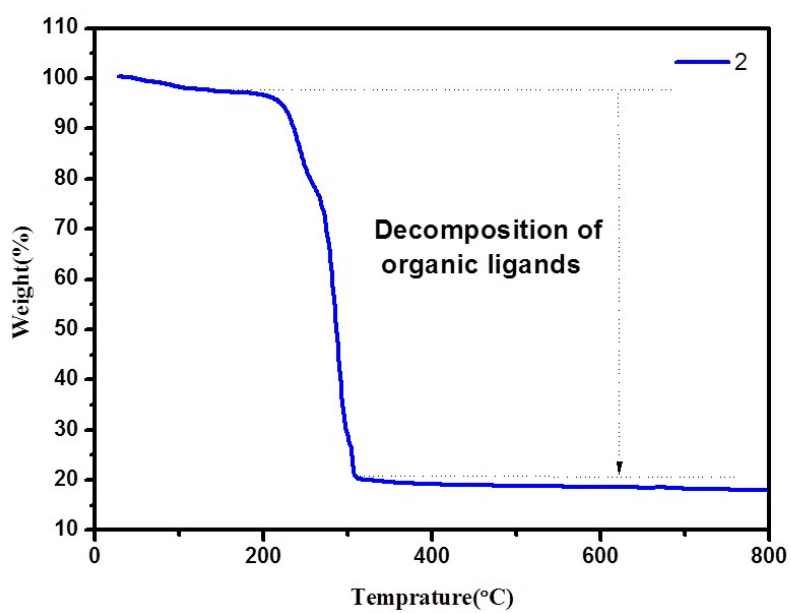

**Fig. S4** TGA graph of 2.

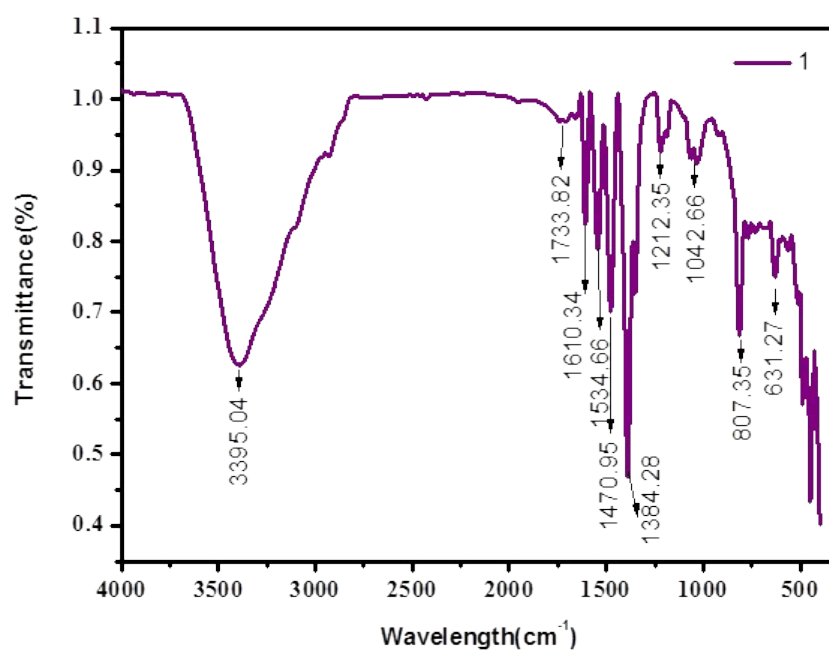

**Fig. S5** FT-IR spectrum of **1**.

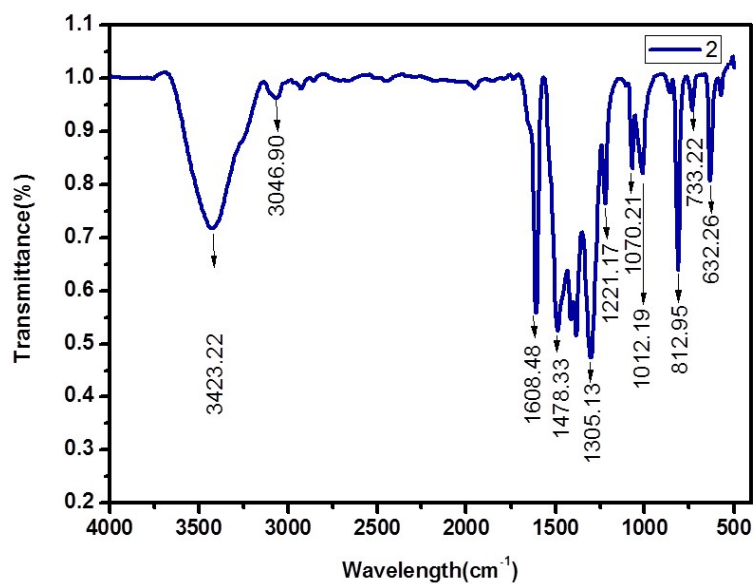

**Fig. S6** FT-IR spectrum of **2**.

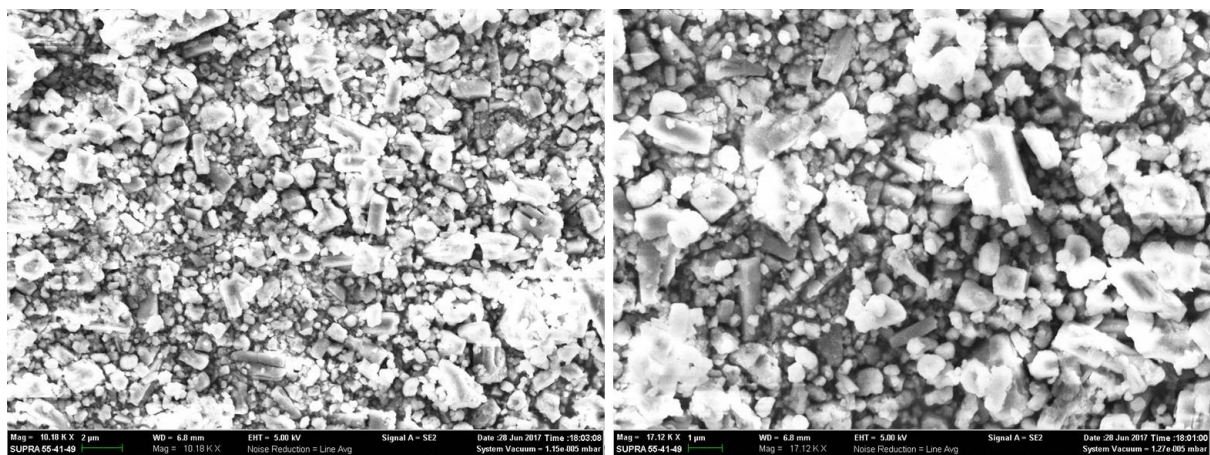

**Fig. S7** SEM images of 1.

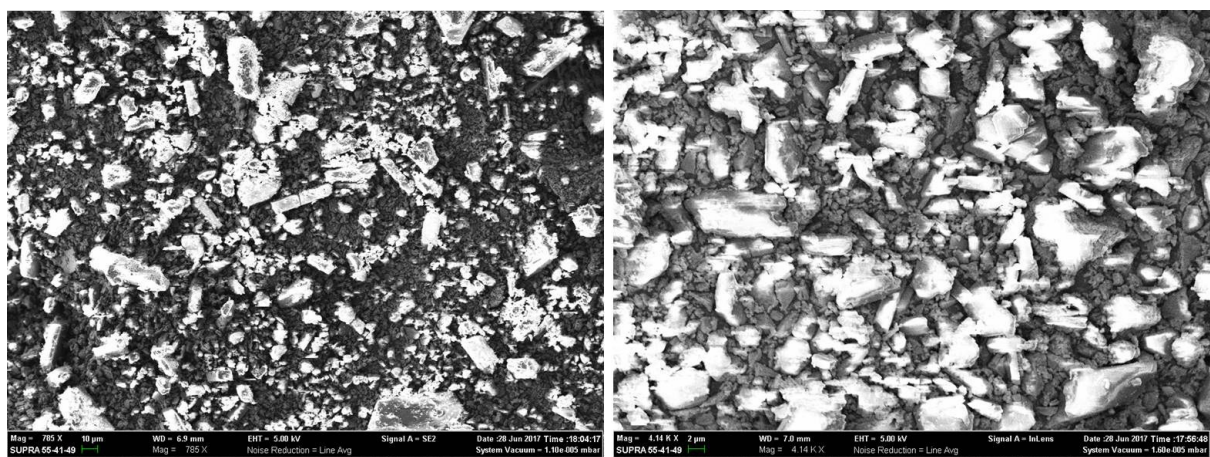

**Fig. S8.** SEM images of 2.

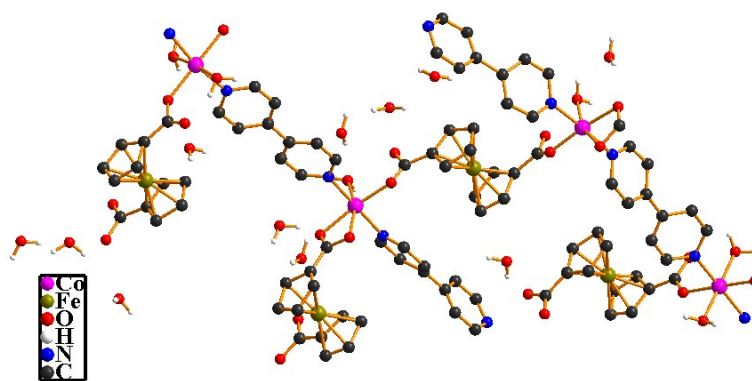

**Fig. S9** Asymmetric unit of **1**.

Color code: O (red), Fe (olive), N (blue), C (dark gray), Co (magenta) and H (light gray).

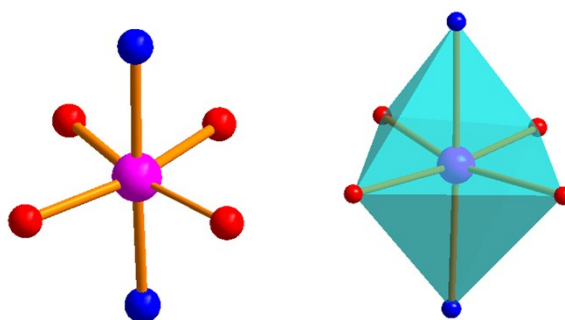

**Fig. S10** Octahedral co-ordination environment around Co(II) center in **1**.

Color code: Co (magenta), N (blue), O (red).



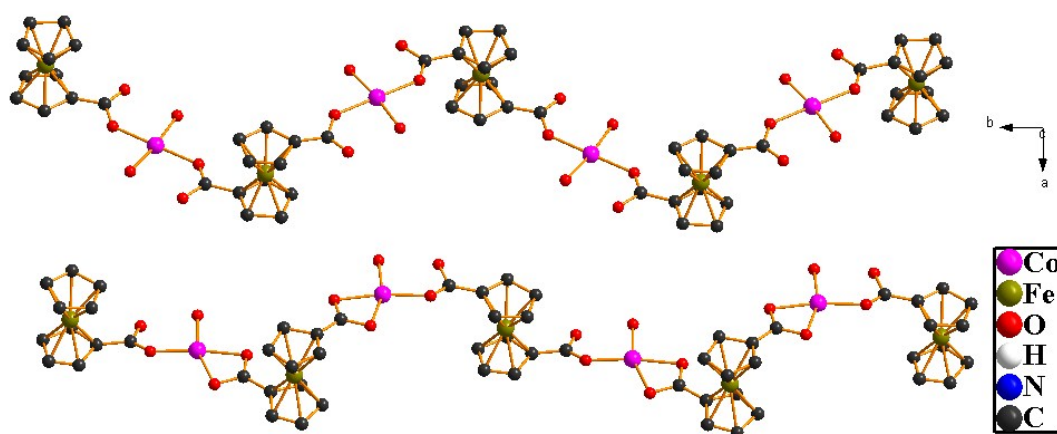

**Fig. S11** 1D chain along  $c$  axis in **1**.  
Color code: O (red), Fe (olive), N (blue), C (dark gray) and Co (magenta).

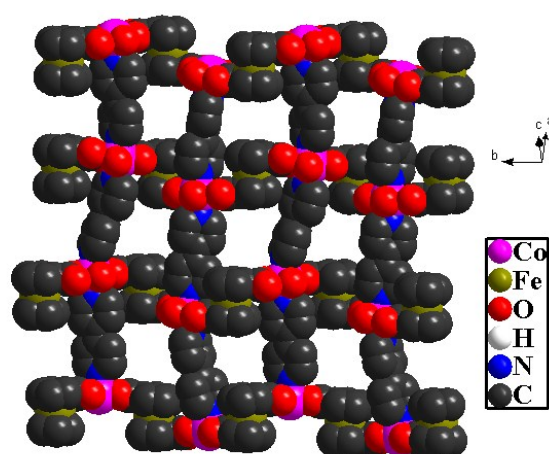

**Fig. S12** Space fill model of the 2D Framework showing the arrangements of FcDCA and bpy ligands along  $c$ -axis in **1**.



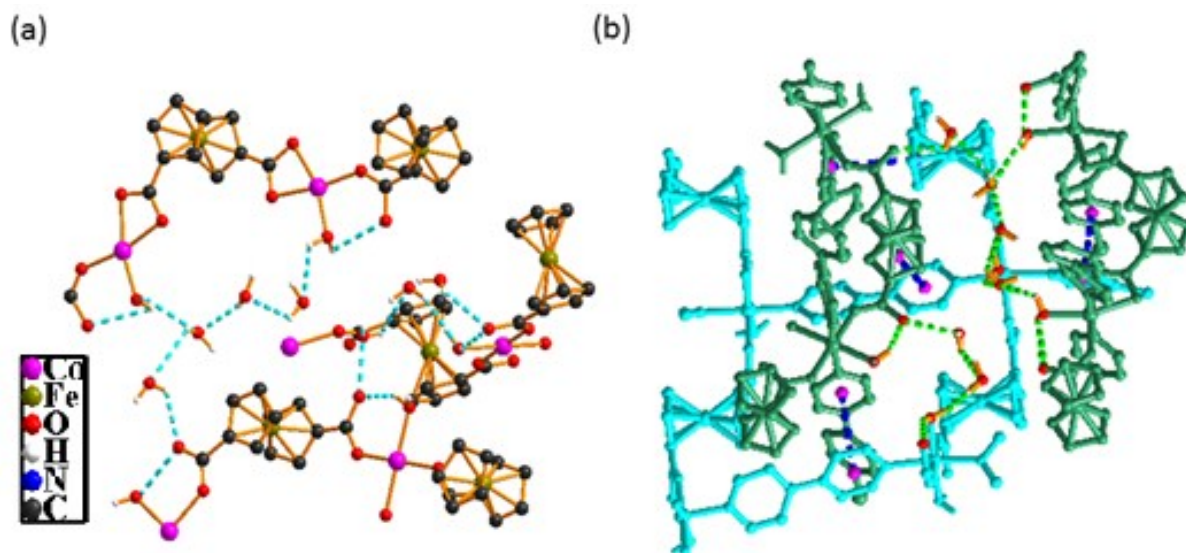

**Fig. S13** (a) Inter/Intra-molecular H- bonding Interaction between the two 2D frameworks, and (b) Packing diagram of **1** showing a 3D framework formed *via* inter/intra-molecular hydrogen-bonding and  $\pi$ - $\pi$  interaction (blue:  $\pi \dots \pi$ ; green: H-bonding).

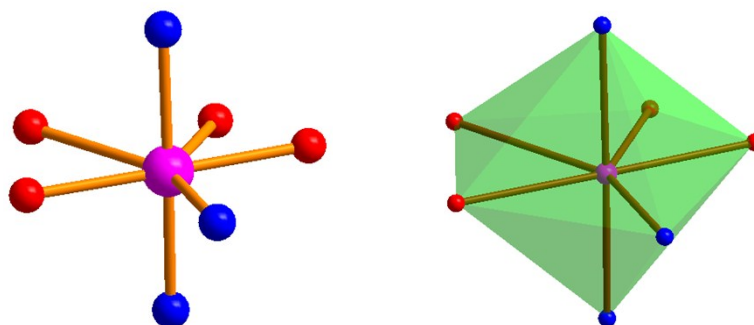

**Fig. S14.** Pentagonal bipyramidal co-ordination environment around Co(II) center in **2**. Color code: Co (magenta), N (blue), O (red).

**Table S1.** Bond lengths [Å] and angles [°] for **1**.

|                     |           |  |
|---------------------|-----------|--|
| Bond distances      |           |  |
| Co(1) —O(4)#1       | 2.07(2)   |  |
| Co(1) —O(1)         | 2.106(18) |  |
| Co(1) —O(5)         | 2.12(2)   |  |
| Co(1) —O(6)         | 2.12(2)   |  |
| Co(1) —N(1)         | 2.15(2)   |  |
| Co(1) —N(6)#1       | 2.19(2)   |  |
| Co(2) —O(7)         | 1.99(2)   |  |
| Co(2) —O            | 2.067(18) |  |
| Co(2) —N(3)         | 2.11(2)   |  |
| Co(2) —O(20)#2      | 2.122(19) |  |
| Co(2) —N(2)         | 2.12(2)   |  |
| Co(2) —O(21)#2      | 2.19(2)   |  |
| Co(3) —O(10)        | 2.03(2)   |  |
| Co(3) —O(17)        | 2.091(19) |  |
| Co(3) —O(18)        | 2.11(2)   |  |
| Co(3) —N(7)         | 2.16(2)   |  |
| Co(3) —N(5)         | 2.18(2)   |  |
| Co(3) —O(19)        | 2.18(2)   |  |
| Co(4) —O(11)        | 2.080(18) |  |
| Co(4) —O(16)#3      | 2.080(19) |  |
| Co(4) —O(13)        | 2.087(18) |  |
| Co(4) —O(12)        | 2.103(18) |  |
| Co(4) —N(8)         | 2.13(2)   |  |
| Co(4) —N(4)#4       | 2.19(2)   |  |
| Bond angles         |           |  |
| O(4)#1—Co(1)—O(1)   | 178.7(9)  |  |
| O(4)#1—Co(1)—O(5)   | 93.2(10)  |  |
| O(1)—Co(1)—O(5)     | 86.9(9)   |  |
| O(4)#1—Co(1)—O(6)   | 87.6(9)   |  |
| O(1)—Co(1)—O(6)     | 92.3(8)   |  |
| O(5)—Co(1)—O(6)     | 179.1(10) |  |
| O(4)#1—Co(1)—N(1)   | 91.6(10)  |  |
| O(1)—Co(1)—N(1)     | 89.7(9)   |  |
| O(5)—Co(1)—N(1)     | 90.2(10)  |  |
| O(6)—Co(1)—N(1)     | 90.0(11)  |  |
| O(4)#1—Co(1)—N(6)#1 | 87.5(9)   |  |
| O(1)—Co(1)—N(6)#1   | 91.2(9)   |  |
| O(5)—Co(1)—N(6)#1   | 88.2(8)   |  |
| O(6)—Co(1)—N(6)#1   | 91.6(9)   |  |
| N(1)—Co(1)—N(6)#1   | 178.1(10) |  |
| O(7)—Co(2)—O(22)    | 90.4(8)   |  |
| O(7)—Co(2)—N(3)     | 87.8(10)  |  |
| O(22)—Co(2)—N(3)    | 88.3(10)  |  |
| O(7)—Co(2)—O(20)#2  | 170.9(9)  |  |
| O(22)—Co(2)—O(20)#2 | 98.6(9)   |  |

|                           |           |
|---------------------------|-----------|
| N(3) — Co(2) — O(20)#2    | 93.5(10)  |
| O(7) — Co(2) — N(2)       | 89.2(8)   |
| O(22) — Co(2) — N(2)      | 94.3(9)   |
| N(3) — Co(2) — N(2)       | 176.0(11) |
| O(20)#2 — Co(2) — N(2)    | 89.2(8)   |
| O(7) — Co(2) — O(21)#2    | 109.5(9)  |
| O(22) — Co(2) — O(21)#2   | 160.1(9)  |
| N(3) — Co(2) — O(21)#2    | 92.0(9)   |
| O(20)#2 — Co(2) — O(21)#2 | 61.5(8)   |
| N(2) — Co(2) — O(21)#2    | 86.6(9)   |
| O(10) — Co(3) — O(17)     | 93.7(9)   |
| O(10) — Co(3) — O(18)     | 167.3(9)  |
| O(17) — Co(3) — O(18)     | 99.0(9)   |
| O(10) — Co(3) — N(7)      | 89.4(8)   |
| O(17) — Co(3) — N(7)      | 89.9(9)   |
| O(18) — Co(3) — N(7)      | 90.3(9)   |
| O(10) — Co(3) — N(5)      | 90.1(10)  |
| O(17) — Co(3) — N(5)      | 92.0(9)   |
| O(18) — Co(3) — N(5)      | 89.8(10)  |
| N(7) — Co(3) — N(5)       | 178.1(11) |
| O(10) — Co(3) — O(19)     | 104.7(9)  |
| O(17) — Co(3) — O(19)     | 161.3(9)  |
| O(18) — Co(3) — O(19)     | 62.6(8)   |
| N(7) — Co(3) — O(19)      | 87.0(8)   |
| N(5) — Co(3) — O(19)      | 91.3(9)   |
| O(10) — Co(3) — C(77)     | 136.2(12) |
| O(17) — Co(3) — C(77)     | 130.0(12) |
| O(18) — Co(3) — C(77)     | 31.1(9)   |
| N(7) — Co(3) — C(77)      | 88.4(9)   |
| N(5) — Co(3) — C(77)      | 90.7(10)  |
| O(19) — Co(3) — C(77)     | 31.6(9)   |
| O(11) — Co(4) — O(16)#3   | 93.1(8)   |
| O(11) — Co(4) — O(13)     | 87.8(8)   |
| O(16)#3 — Co(4) — O(13)   | 179.1(9)  |
| O(11) — Co(4) — O(12)     | 173.7(8)  |
| O(16)#3 — Co(4) — O(12)   | 92.6(8)   |
| O(13) — Co(4) — O(12)     | 86.5(9)   |
| O(11) — Co(4) — N(8)      | 90.6(9)   |
| O(16)#3 — Co(4) — N(8)    | 87.9(9)   |
| O(13) — Co(4) — N(8)      | 92.2(8)   |
| O(12) — Co(4) — N(8)      | 87.0(9)   |
| O(11) — Co(4) — N(4)#4    | 92.7(10)  |
| O(16)#3 — Co(4) — N(4)#4  | 83.5(9)   |
| O(13) — Co(4) — N(4)#4    | 96.3(8)   |
| O(12) — Co(4) — N(4)#4    | 90.5(9)   |
| N(8) — Co(4) — N(4)#4     | 170.9(10) |

Symmetry transformations used to generate equivalent atoms:

#1  $-x+2, y-1/2, -z+3/2$  #2  $x, y-1, z$  #3  $-x, y-1/2, -z+1/2$

#4  $-x, y+1/2, -z+1/2$

**Table S2.** H-bonding Interactions in **1**.

| D-H·····A               | D-H   | H···A | D···A       | ∠D-H···A |
|-------------------------|-------|-------|-------------|----------|
| O12-H12B·····O14 (0)    | 0.938 | 1.699 | 2.567(.030) | 152.42   |
| O110-H11C·····O111 (18) | 0.938 | 1.976 | 2.791(.018) | 144.13   |
| O107-H10M·····O103 (11) | 0.938 | 2.469 | 2.805(.023) | 103.10   |
| O106-H10L·····O109 (11) | 0.938 | 2.077 | 2.712(.017) | 123.69   |
| O105-H10J·····O102 (8)  | 0.938 | 2.320 | 2.822(.019) | 113.08   |
| O109-H10R·····O106 (5)  | 0.938 | 1.963 | 2.712(.017) | 135.46   |
| O102-H10C·····O107 (5)  | 0.938 | 2.077 | 2.786(.015) | 131.19   |
| O17-H17B·····O107 (5)   | 0.938 | 2.143 | 2.805(.023) | 126.55   |
| O11-H11B·····O15 (3)    | 0.938 | 1.815 | 2.625(.030) | 142.90   |
| O103-H10E·····O107 (5)  | 0.938 | 2.627 | 2.948(.017) | 100.64   |
| O5-H5B·····O3 (2)       | 0.938 | 1.816 | 2.657(.033) | 147.79   |
| O5-H5A·····O108 (1)     | 0.938 | 2.375 | 2.931(.027) | 117.68   |
| O110-H11D·····O106 (0)  | 0.938 | 2.015 | 2.581(.017) | 117.10   |
| O106-H10K·····O110 (0)  | 0.938 | 2.096 | 2.581(.017) | 110.73   |
| O103-H10F·····O104 (0)  | 0.938 | 2.481 | 2.854(.013) | 103.82   |
| O102-H10D·····O101 (0)  | 0.938 | 2.088 | 2.612(.014) | 113.79   |
| O22-H22A·····O105 (0)   | 0.938 | 2.317 | 2.728(.026) | 105.95   |
| O107-H10M·····O17 (11)  | 0.938 | 2.469 | 2.805(.023) | 101.10   |
| O111-H11F·····O110 (14) | 0.938 | 2.385 | 2.791(.018) | 105.87   |
| O103-H10E·····O2 (16)   | 0.938 | 2.327 | 2.749(.024) | 106.81   |
| O103-H10F·····O104 (0)  | 0.938 | 2.481 | 2.854(.013) | 103.82   |
| O101-H10A·····O18 (0)   | 0.938 | 2.449 | 2.805(.023) | 102.42   |

Equivalent positions:

- (0)  $x, y, z$
- (1)  $-x+1/2+1, -y+1, +z+1/2$
- (2)  $-x+2, +y-1/2, -z+1/2+1$
- (3)  $-x, +y-1/2, -z+1/2$
- (4)  $-x+1/2, -y, +z-1/2$
- (5)  $-x+1/2, -y+1, +z+1/2$
- (8)  $x, +y-1, +z$
- (11)  $-x+1/2, -y+1, +z-1/2$
- (14)  $x+1/2, -y+1/2+1, -z+1$
- (16)  $-x+1, +y+1/2, -z+1/2+1$
- (18)  $x-1/2, -y+1/2+1, -z+1$

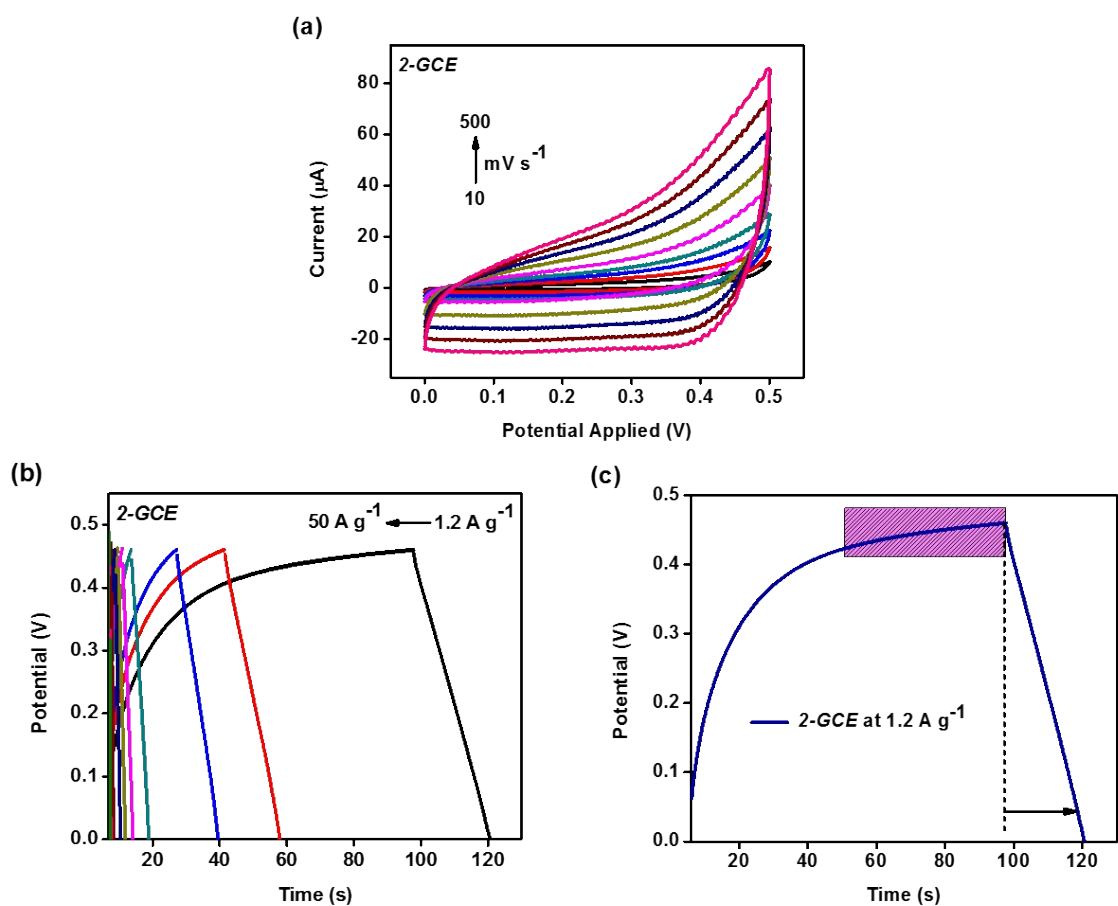

**Fig. S15** (a) CV profiles of **2-GCE** at varied scan rates (10-500  $\text{mV s}^{-1}$ ), (b) GCD curves for **2-GCE** at varied current densities (1.2-50  $\text{A g}^{-1}$ ), and (c) GCD curves for **2-GCE** at 1.2  $\text{A g}^{-1}$ , in 1 M KOH solution.

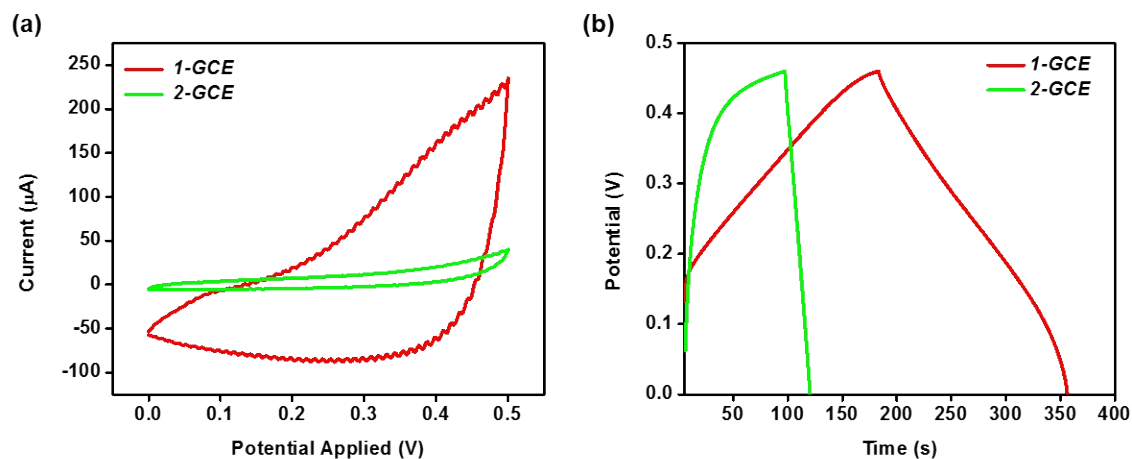

**Fig. S16** (a) Comparison of CV profiles of *1-GCE* and *2-GCE* at a scan rate of  $100 \text{ mV s}^{-1}$ , (b) comparison of GCD profiles of *1-GCE* and *2-GCE* at  $1.2 \text{ A g}^{-1}$ .

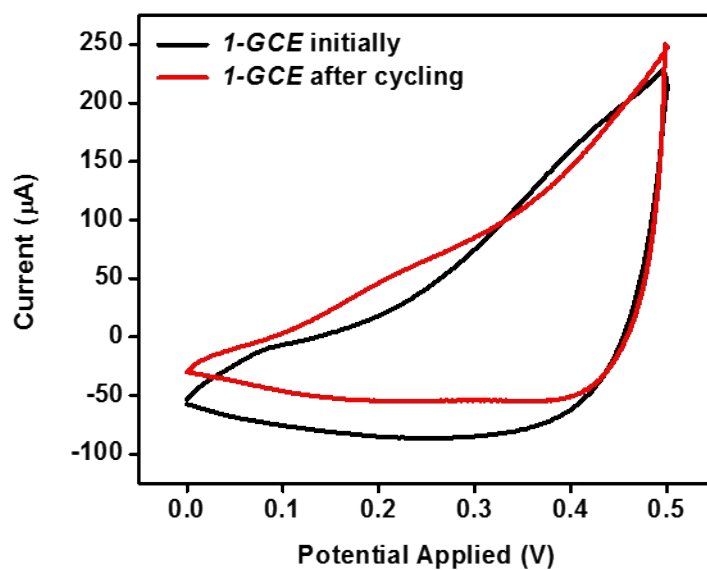

**Fig. S17** Comparison of CV profiles of *1-GCE* before and after cycling.



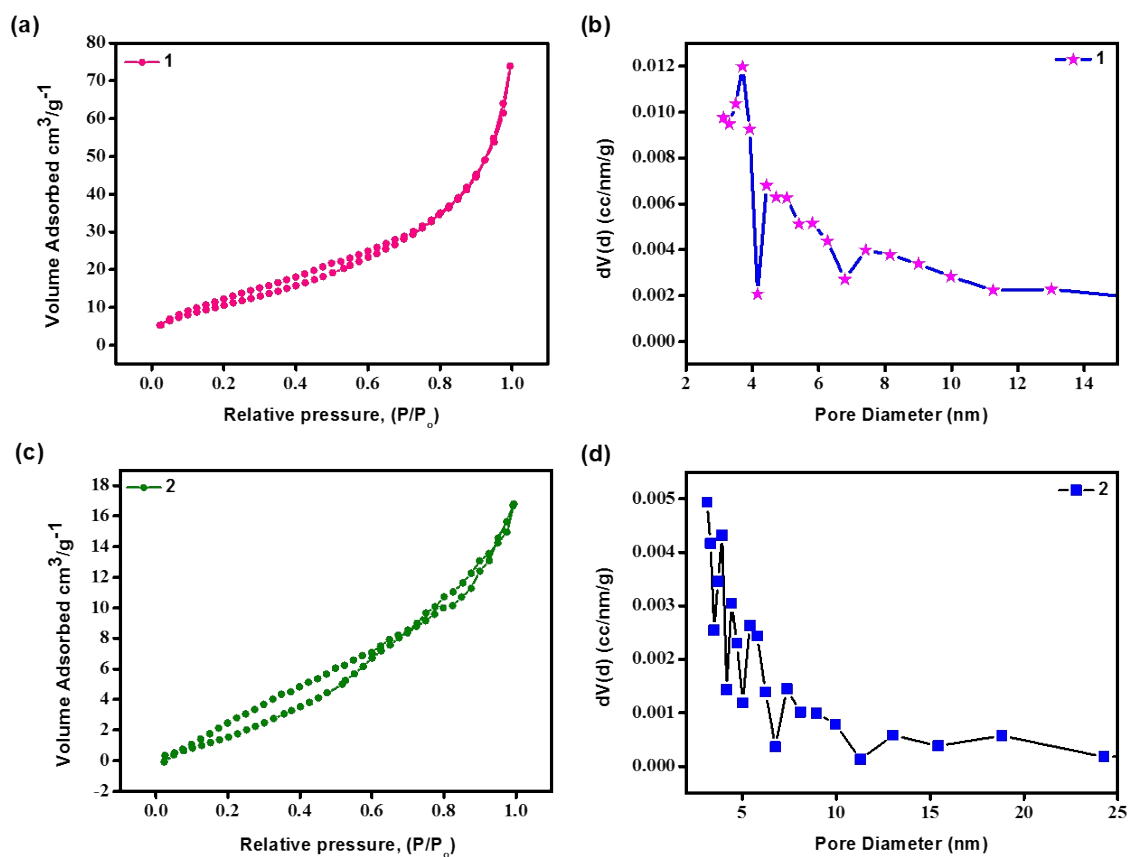

**Fig. S18** N<sub>2</sub> isotherm and BJH plot of (a) **1** and (b) **2**, respectively.

The N<sub>2</sub> isotherm reveals a high BET surface area of 41.56 m<sup>2</sup>/g for **1** and 10.306 m<sup>2</sup>/g for **2** as obtained from Fig. S18a and Fig. S18c, respectively. Additionally, the BJH curves have also been shown for **1** and **2** in Fig. S18b and Fig. S18d, respectively.

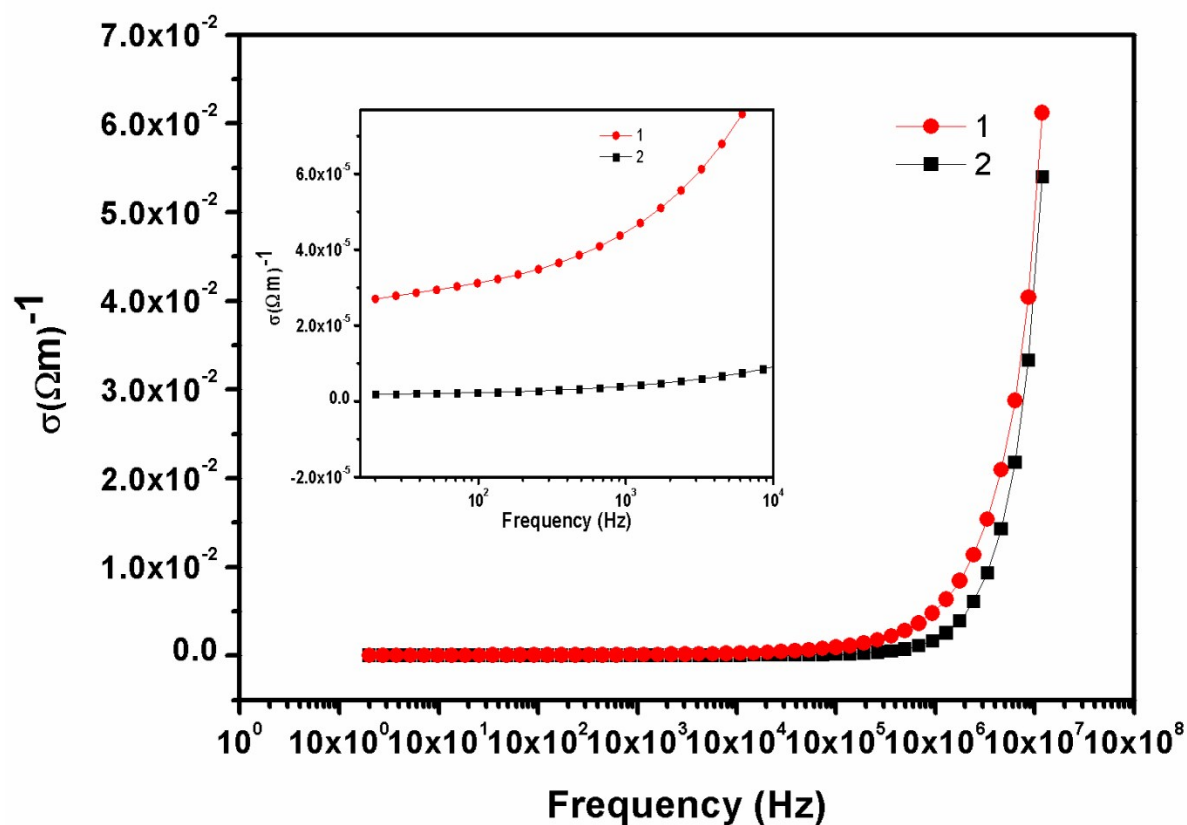

**Fig. S19** AC conductivity test of **1** and **2**.

The AC conductivity measurements were performed to reveal the conductivity of **1** and **2**. The resistance of **1** and **2** were analysed with varying frequencies and the conductivities were plotted as shown in **Fig. S19**. The results clearly show that **1** has better conductivity than **2**.

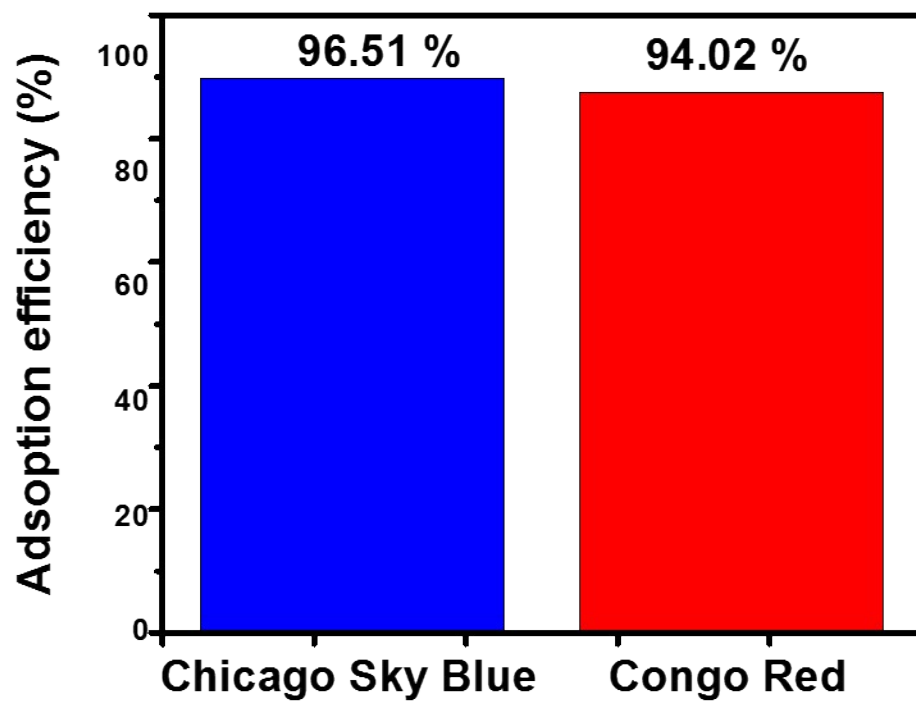

**Fig. S20** Adsorption of CSB and CR on 1.

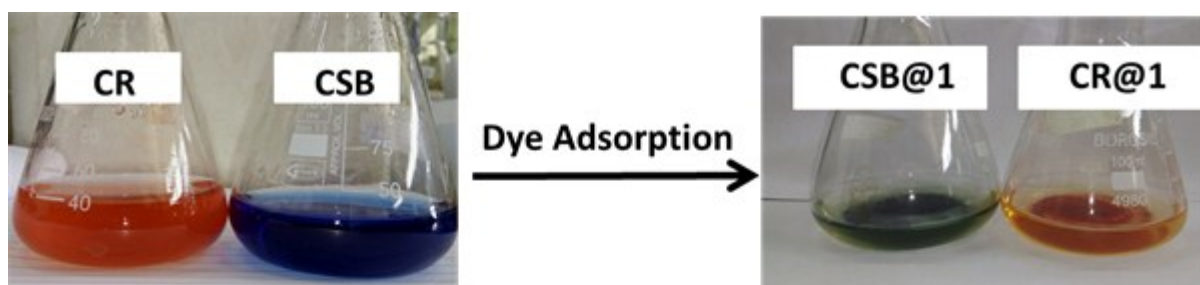

**Fig. S21** Color change of the reaction system containing (A) CSB, (B) CR in water on 1.

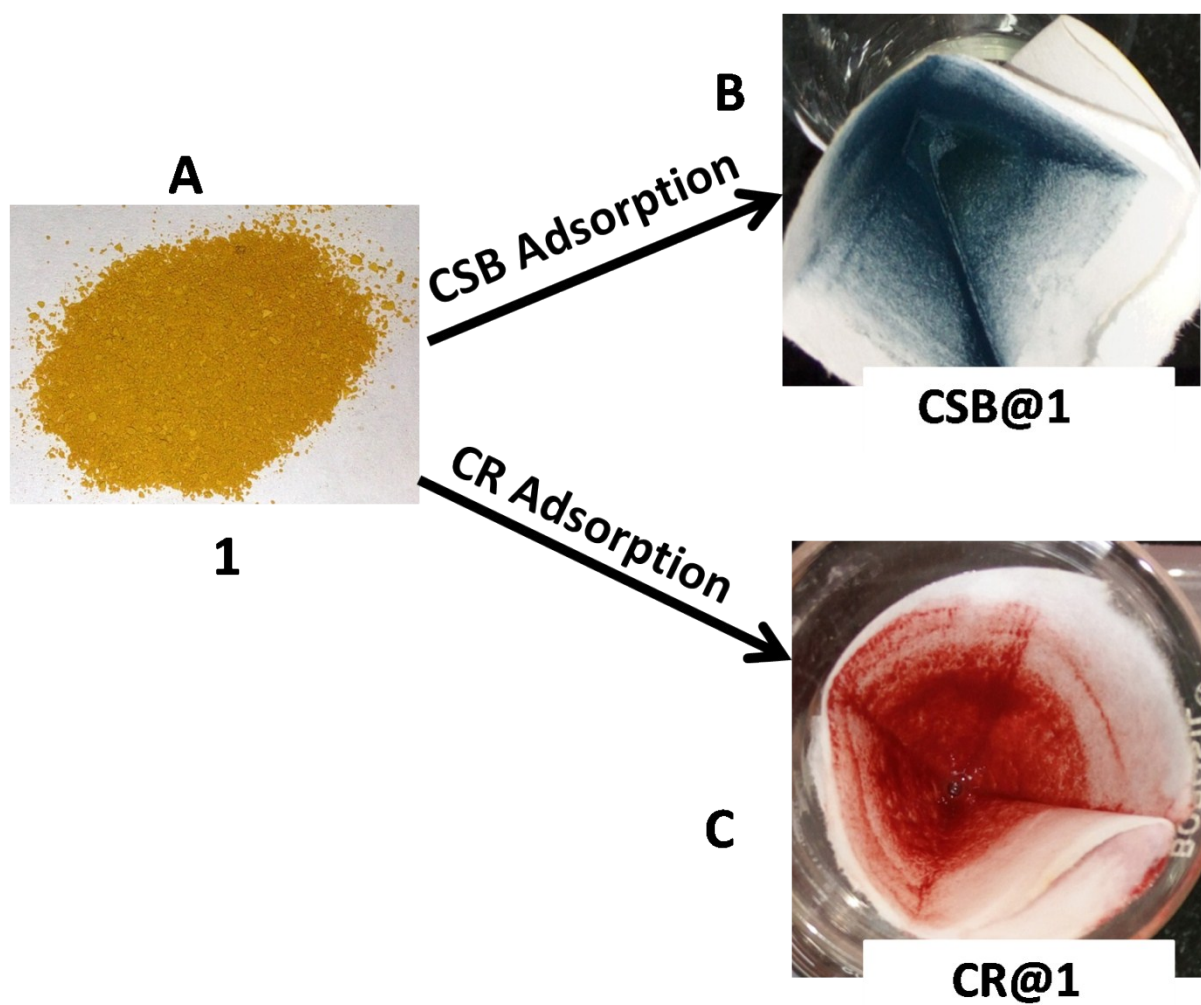

**Fig. S22** Color change of **1**, (A) before adsorption, (B) after adsorption of CSB (C) after adsorption of CR.

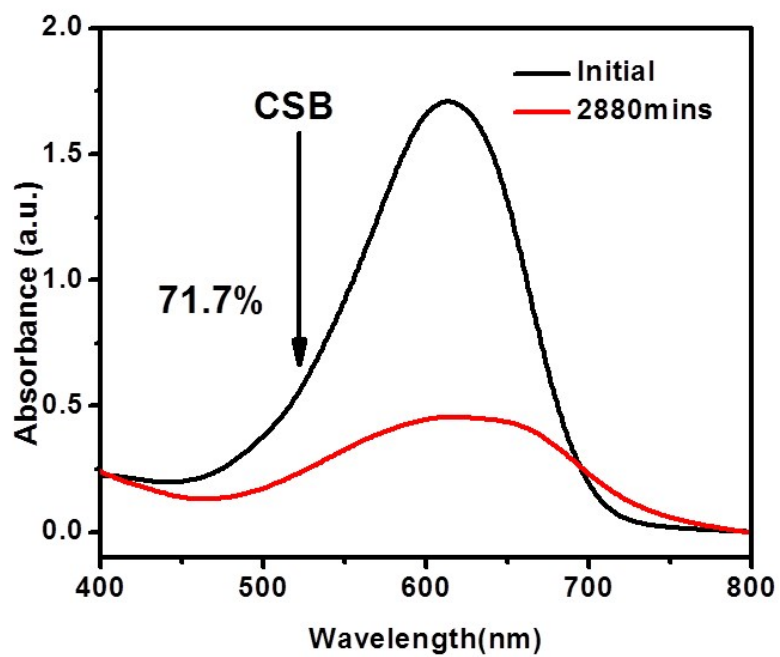

**Fig. S23** UV-*vis* spectra of aqueous solution of CSB adsorption by **2**.

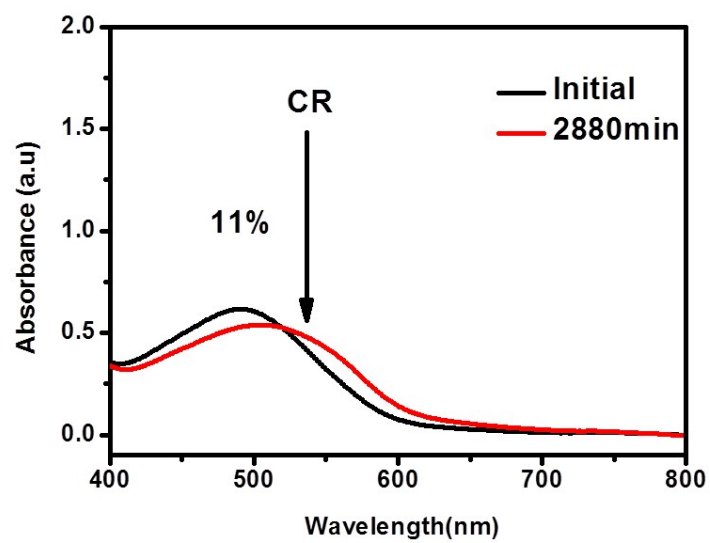

**Fig. S24** UV-*vis* spectra of aqueous solution of CR adsorption by **2**.

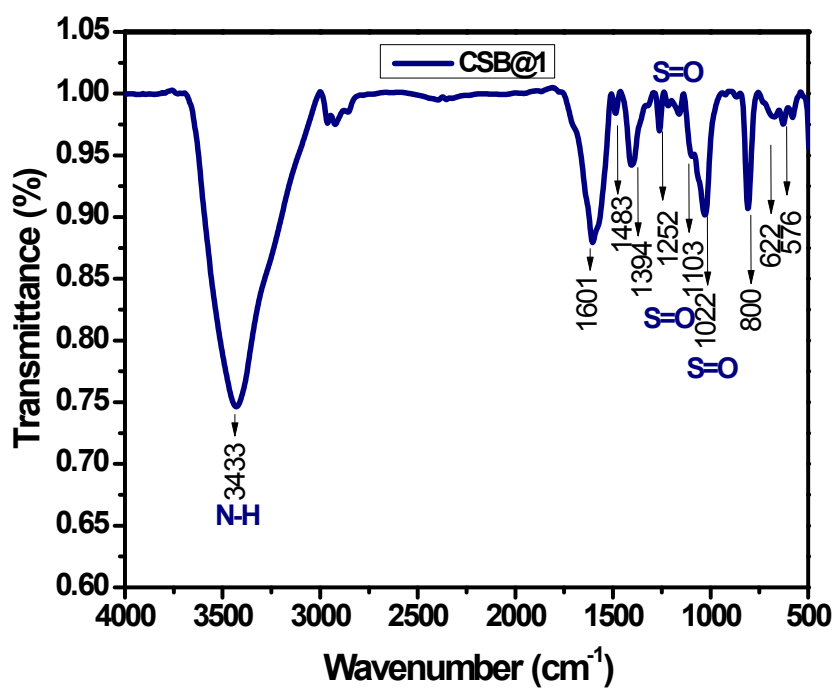

Fig. S25 FTIR analysis of CSB adsorbed on 1 (CSB@1).

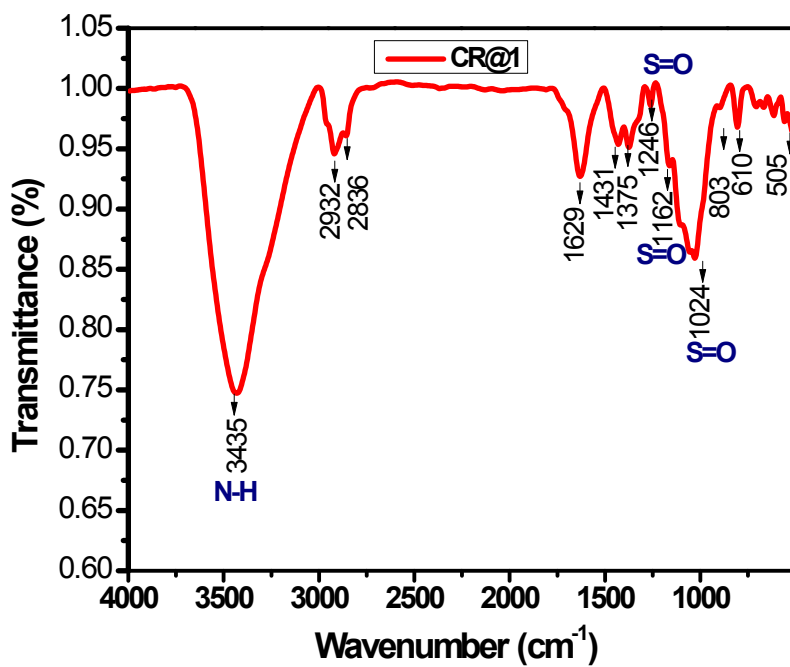

Fig. S26 FTIR analysis of CR adsorbed on 1 (CR@1).

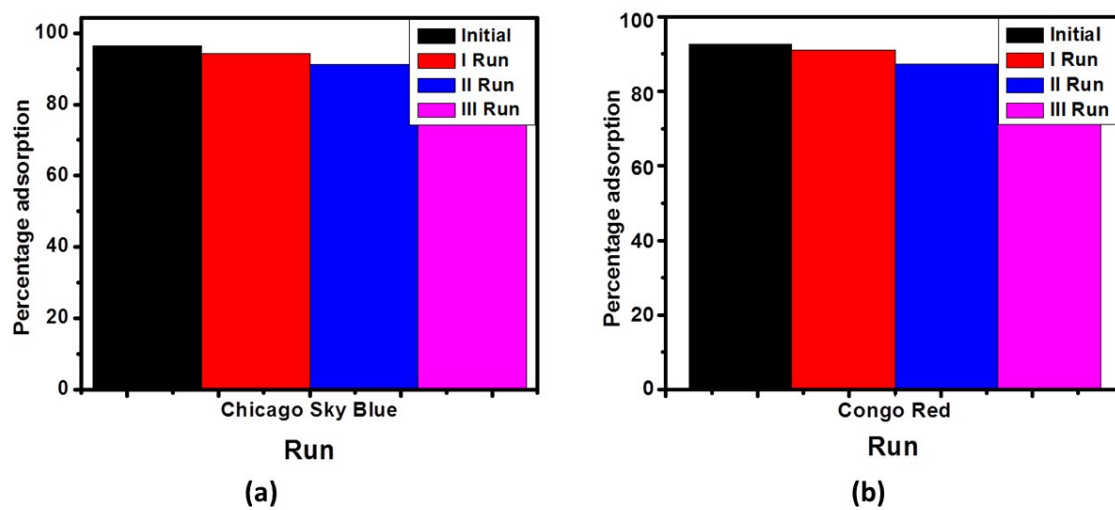

**Fig. S27** Recyclability study of **1** towards (a) CSB and (b) CR.



### Calculation of product yield

$$\% \text{ Yield} = \frac{\text{actual number of moles}}{\text{theoretical number of moles}} \times 100\%$$

| Compound | Weight (mg) | Theoretical number of moles (mmol) | Actual number of moles (mmol) | Yield (%) |
|----------|-------------|------------------------------------|-------------------------------|-----------|
| 1        | 68          | 0.05                               | 0.03                          | 60.3      |
| 2        | 60          | 0.2                                | 0.14                          | 72.6      |
